# Supplementary material for: #Healthy Selfies: Exploration of Health Topics on Instagram
Source: PubMed Central journal article supplement (PMC6045785; doi:10.2196/10150), 2018-06-29
Supplement: publichealth_v4i2e10150_app2.pdf [file publichealth_v4i2e10150_app2.pdf]

## Acute illness

|                 | <i>Illness</i>                                                                            | <i>Allergies</i>                                                                                        |
|-----------------|-------------------------------------------------------------------------------------------|---------------------------------------------------------------------------------------------------------|
| <b>Hashtags</b> | health<br>flu<br>sick<br>instalike<br>green<br>nofilter<br>white<br>day<br>relax<br>fresh | allergies<br>asthma<br>allergy<br>hayfever<br>itchy<br>allergic<br>sick<br>sneezing<br>spring<br>sneeze |
| <b>Caption</b>  | week<br>work<br>days<br>sick<br>miss<br>season<br>weeks<br>flu<br>bring<br>weather        | allergies<br>asthma<br>allergic<br>allergy<br>itchy<br>year<br>weather<br>inhaler<br>eyes<br>reaction   |
| <b>Image</b>    | person<br>hair<br>young<br>nature<br>colored<br>baby<br>red<br>dress<br>jacket<br>maple   | indoor<br>people<br>woman<br>soup<br>brown<br>field<br>dog<br>variety<br>boy<br>grassy                  |

## Alternative medicine

|                 | <i>Alternative medicine</i>                                                                                       | <i>Natural remedies (40)</i>                                                                                                    | <i>Natural remedies (104)</i>                                                                 | <i>Massage</i>                                                                                               | <i>Vitamins &amp; supplements</i>                                                                              | <i>Yoga</i>                                                                                                    |
|-----------------|-------------------------------------------------------------------------------------------------------------------|---------------------------------------------------------------------------------------------------------------------------------|-----------------------------------------------------------------------------------------------|--------------------------------------------------------------------------------------------------------------|----------------------------------------------------------------------------------------------------------------|----------------------------------------------------------------------------------------------------------------|
| <b>Hashtags</b> | acupuncture<br>health<br>wellness<br>healing<br>holistic<br>yoga<br>chinesemedicine<br>medicine<br>tcm<br>natural | essentialoils<br>natural<br>organic<br>wellness<br>holistic<br>doterra<br>aromatherapy<br>allnatural<br>momlife<br>chemicalfree | sick<br>healthy<br>natural<br>remedy<br>ginger<br>fever<br>nausea<br>clean<br>fall<br>florida | massage<br>pain<br>relax<br>arthritis<br>aches<br>therapy<br>wellness<br>painrelief<br>tension<br>relaxation | vitamins<br>health<br>wellness<br>energy<br>vegan<br>detox<br>nutrition<br>supplements<br>guthealth<br>natural | yoga<br>breathing<br>yogi<br>balance<br>yogaeverydamnday<br>meditation<br>namaste<br>ear<br>breathe<br>stretch |
| <b>Caption</b>  | health<br>medicine<br>healing<br>acupuncture<br>natural<br>herbal<br>symptoms<br>herbs<br>chinese<br>heal         | oil<br>oils<br>essential<br>blend<br>drops<br>cold<br>lavender<br>peppermint<br>support<br>respiratory                          | sick<br>feel<br>ginger<br>morning<br>time<br>throat<br>pain<br>sore<br>food<br>made           | pain<br>massage<br>body<br>muscle<br>muscles<br>relief<br>deep<br>arthritis<br>sore<br>aches                 | health<br>system<br>body<br>immune<br>vitamin<br>healthy<br>benefits<br>helps<br>natural<br>vitamins           | yoga<br>body<br>love<br>breathing<br>mind<br>class<br>breath<br>practice<br>pose<br>breathe                    |
| <b>Image</b>    | indoor<br>red<br>animal<br>food<br>forest<br>drink<br>arranged<br>wood<br>wooden<br>ceiling                       | several<br>food<br>hand<br>mammal<br>soup<br>drink<br>baby<br>wood<br>holding<br>beer                                           | laying<br>white<br>bed<br>cup<br>yellow<br>coffee<br>dish<br>beautiful<br>half<br>garden      | indoor<br>close<br>man<br>floor<br>decorated<br>wearing<br>half<br>hotel<br>honey<br>cake                    | beverage<br>vegetable<br>indoor<br>fresh<br>plant<br>arranged<br>plastic<br>fruit<br>different<br>fruitdrink   | beautiful<br>indoor<br>shore<br>tree<br>water<br>beach<br>floor<br>park<br>feet<br>silhouette                  |

## Chronic illness & pain

|                 | <i>Chronic illness</i>                                                                                                                                          | <i>Cancer</i>                                                                                                                 | <i>Diabetes</i>                                                                                                           | <i>Musculoskeletal pain</i>                                                                      | <i>Headaches</i>                                                                                          | <i>Headaches and body aches</i>                                                                             |
|-----------------|-----------------------------------------------------------------------------------------------------------------------------------------------------------------|-------------------------------------------------------------------------------------------------------------------------------|---------------------------------------------------------------------------------------------------------------------------|--------------------------------------------------------------------------------------------------|-----------------------------------------------------------------------------------------------------------|-------------------------------------------------------------------------------------------------------------|
| <b>Hashtags</b> | chronicillness<br>spoonie<br>chronicpain<br>invisibleillness<br>fibromyalgia<br>arthritis<br>autoimmunedisease<br>butyoudontlooksick<br>chronicfatigue<br>lupus | cancer<br>cure<br>chemo<br>breastcancer<br>cancersucks<br>breastcancerawareness<br>pink<br>chemotherapy<br>fuckcancer<br>hope | diabetes<br>type<br>diabetic<br>inspiration<br>wellness<br>diabetesawareness<br>insulin<br>healthy<br>strong<br>diabadass | spine<br>pain<br>chiropractic<br>backpain<br>muscles<br>smile<br>yoga<br>life<br>back<br>massage | selfie<br>migraines<br>migraine<br>ouch<br>sick<br>blue<br>anxiety<br>goodnight<br>sleep<br>blackandwhite | health<br>headache<br>headaches<br>migraines<br>stress<br>detox<br>fatigue<br>allergies<br>cramps<br>energy |
| <b>Caption</b>  | pain<br>hope<br>feel<br>i've<br>chronic<br>don't<br>bad<br>time<br>day<br>illness                                                                               | cancer<br>breast<br>awareness<br>month<br>pink<br>support<br>women<br>chemo<br>fight<br>family                                | i've<br>blood<br>life<br>diabetes<br>type<br>sugar<br>friends<br>make<br>high<br>live                                     | back<br>pain<br>spine<br>neck<br>important<br>lower<br>shoulder<br>core<br>stretch<br>spinal     | pain<br>migraine<br>today<br>feeling<br>migraines<br>days<br>head<br>headache<br>morning<br>work          | body<br>stress<br>stomach<br>headaches<br>taking<br>works<br>headache<br>helps<br>years<br>tea              |
| <b>Image</b>    | posing<br>mammal<br>wall<br>bed<br>seat<br>hat<br>hand<br>domesticcat<br>close<br>sofa                                                                          | group<br>standing<br>people<br>beautiful<br>crowd<br>little<br>girl<br>wearing<br>white<br>pink                               | posing<br>different<br>man<br>sitting<br>spectacles<br>sleeping<br>glass<br>line<br>alcohol<br>container                  | wall<br>animal<br>group<br>floor<br>sky<br>posing<br>woman<br>red<br>water<br>wooden             | close<br>drink<br>hair<br>room<br>dark<br>decorated<br>indoor<br>carseat<br>open<br>sunset                | woman<br>food<br>plant<br>clothing<br>white<br>spectacles<br>window<br>fruitdrink<br>half<br>snackfood      |

## Diet (Page 1)

|                 | <i>Food</i>                                                                                                             | <i>Healthy food (3)</i>                                                                                              | <i>Healthy food (68)</i>                                                                                           | <i>Meat</i>                                                                                             | <i>Desserts</i>                                                                                      | <i>Vitamins &amp; supplements</i>                                                                              |
|-----------------|-------------------------------------------------------------------------------------------------------------------------|----------------------------------------------------------------------------------------------------------------------|--------------------------------------------------------------------------------------------------------------------|---------------------------------------------------------------------------------------------------------|------------------------------------------------------------------------------------------------------|----------------------------------------------------------------------------------------------------------------|
| <b>Hashtags</b> | foodporn<br>foodie<br>food<br>instafood<br>yummy<br>delicious<br>foodphotography<br>foodgasm<br>foodstagram<br>cravings | healthy<br>vegan<br>food<br>healthyfood<br>plantbased<br>vegansofig<br>vegetarian<br>foodie<br>instafood<br>eatclean | healthy<br>vegan<br>organic<br>glutenfree<br>eatclean<br>cleaneating<br>nutrition<br>healthyfood<br>paleo<br>fruit | ribs<br>foodporn<br>food<br>bbq<br>cured<br>meat<br>foodie<br>friends<br>beef<br>pork                   | food<br>cravings<br>foodporn<br>delicious<br>chocolate<br>foodie<br>yummy<br>dessert<br>sweet<br>yum | vitamins<br>health<br>wellness<br>energy<br>vegan<br>detox<br>nutrition<br>supplements<br>guthealth<br>natural |
| <b>Caption</b>  | food<br>good<br>make<br>love<br>likes<br>delicious<br>yum<br>yummy<br>amazing<br>weekend                                | chicken<br>dinner<br>eat<br>soup<br>rice<br>salad<br>meal<br>garlic<br>cheese<br>delicious                           | coconut<br>add<br>cup<br>water<br>oil<br>milk<br>honey<br>salt<br>recipe<br>ingredients                            | ribs<br>order<br>make<br>free<br>good<br>bbq<br>pic<br>dinner<br>great<br>nice                          | chocolate<br>cream<br>pumpkin<br>eat<br>good<br>made<br>butter<br>ice<br>cake<br>peanut              | health<br>system<br>body<br>immune<br>vitamin<br>healthy<br>benefits<br>helps<br>natural<br>vitamins           |
| <b>Image</b>    | dish<br>meal<br>meat<br>piecederesistance<br>plate<br>sliced<br>table<br>piece<br>containing<br>arranged                | meat<br>dish<br>vegetable<br>meal<br>containing<br>piecederesistance<br>cooked<br>bowl<br>sauce<br>toppings          | fruit<br>dessert<br>fresh<br>sliced<br>food<br>plate<br>table<br>slice<br>containing<br>soup                       | dish<br>meat<br>barbecue<br>cooked<br>piecederesistance<br>pan<br>cooking<br>grill<br>sandwich<br>slice | dessert<br>chocolate<br>slice<br>food<br>piece<br>eaten<br>cream<br>plate<br>fork<br>pastry          | beverage<br>vegetable<br>indoor<br>fresh<br>plant<br>arranged<br>plastic<br>fruit<br>different<br>fruitdrink   |

## Diet (Page 2)

|                 | <i>DiETING &amp; weight loss</i>                                                                        | <i>Weight loss (82)</i>                                                                                                                                        | <i>Weight loss (94)</i>                                                                                                 | <i>Eating disorders</i>                                                                                                                     | <i>Caffeine</i>                                                                                                      | <i>Alcohol</i>                                                                                  |
|-----------------|---------------------------------------------------------------------------------------------------------|----------------------------------------------------------------------------------------------------------------------------------------------------------------|-------------------------------------------------------------------------------------------------------------------------|---------------------------------------------------------------------------------------------------------------------------------------------|----------------------------------------------------------------------------------------------------------------------|-------------------------------------------------------------------------------------------------|
| <b>Hashtags</b> | fitness<br>weightloss<br>nutrition<br>diet<br>healthy<br>fitfam<br>protein<br>dieting<br>fit<br>workout | weightloss<br>weightlossjourney<br>fitfam<br>wls<br>transformation<br>gastric<br>wlscommunity<br>weightlosstransformation<br>gastricbypass<br>bariatricsurgery | weightloss<br>diet<br>healthy<br>dieting<br>fitfam<br>weightlossjourney<br>food<br>healthyeating<br>fitness<br>exercise | recovery<br>anorexia<br>edrecovery<br>eatingdisorder<br>ana<br>eatingdisorderrecovery<br>edwarrior<br>ed<br>anorexiarecovery<br>prorecovery | caffeine<br>coffee<br>coffeelover<br>coffeeaddict<br>coffeetime<br>coffeeholic<br>hot<br>drink<br>cafe<br>coffeegram | alcohol<br>thirsty<br>drinks<br>beer<br>cocktails<br>wine<br>drink<br>cocktail<br>bar<br>yummy  |
| <b>Caption</b>  | food<br>eating<br>eat<br>weight<br>diet<br>fat<br>body<br>protein<br>healthy<br>meal                    | amazing<br>congrats<br>great<br>good<br>weight<br>i've<br>work<br>i'll<br>lbs<br>proud                                                                         | week<br>back<br>days<br>morning<br>tonight<br>weeks<br>healthy<br>don't<br>bit<br>weekend                               | day<br>i've<br>today<br>hope<br>eating<br>feel<br>recovery<br>don't<br>proud<br>strong                                                      | coffee<br>day<br>tea<br>today<br>love<br>drink<br>cup<br>hot<br>green<br>feeling                                     | drink<br>glass<br>beer<br>water<br>wine<br>make<br>cheers<br>juice<br>bottle<br>bar             |
| <b>Image</b>    | meal<br>dish<br>vegetable<br>plate<br>different<br>fresh<br>table<br>containing<br>wall<br>snackfood    | dish<br>standing<br>indoor<br>meat<br>meal<br>pan<br>eaten<br>smiling<br>container<br>different                                                                | meat<br>meal<br>table<br>breakfast<br>dinner<br>piecederesistance<br>cup<br>plate<br>potato<br>egg                      | plate<br>meal<br>vegetable<br>breakfast<br>table<br>sliced<br>containing<br>dish<br>eaten<br>snackfood                                      | beverage<br>food<br>coffee<br>table<br>drink<br>coffeecup<br>breakfast<br>pastry<br>dixiecup<br>doughnut             | beverage<br>glass<br>drink<br>alcohol<br>beer<br>fruitdrink<br>food<br>drinking<br>empty<br>bar |

## Exercise (Page 1)

|                 | <i>Exercise</i>                                                                                           | <i>Running &amp; cardio</i>                                                                      | <i>Gym / bodybuilding</i>                                                                                           | <i>Gym / fitness</i>                                                                                       | <i>Gym / fitness training</i>                                                                            |
|-----------------|-----------------------------------------------------------------------------------------------------------|--------------------------------------------------------------------------------------------------|---------------------------------------------------------------------------------------------------------------------|------------------------------------------------------------------------------------------------------------|----------------------------------------------------------------------------------------------------------|
| <b>Hashtags</b> | workout<br>exercise<br>motivation<br>training<br>fit<br>fitspo<br>strong<br>bodybuilding<br>gym<br>cardio | running<br>run<br>runner<br>training<br>cardio<br>fitness<br>fit<br>exercise<br>marathon<br>sore | fitfam<br>fitspo<br>bodybuilding<br>girlswholift<br>fit<br>gym<br>gymlife<br>fitnessmotivation<br>gains<br>instafit | workout<br>fitness<br>gym<br>fit<br>exercise<br>fitfam<br>fitnessmotivation<br>fitlife<br>gymlife<br>goals | workout<br>abs<br>gym<br>muscle<br>chest<br>bodybuilding<br>cardio<br>strength<br>legs<br>squats         |
| <b>Caption</b>  | love<br>amazing<br>awesome<br>great<br>body<br>girl<br>goals<br>inspiration<br>wow<br>fitness             | run<br>running<br>today<br>race<br>marathon<br>walk<br>miles<br>mile<br>finish<br>half           | you're<br>text<br>join<br>page<br>message<br>number<br>great<br>clothing<br>team<br>brand                           | week<br>day<br>workout<br>work<br>good<br>gym<br>hard<br>i've<br>today<br>start                            | work<br>back<br>legs<br>leg<br>strong<br>workout<br>working<br>chest<br>strength<br>session              |
| <b>Image</b>    | beautiful<br>person<br>standing<br>lady<br>female<br>clothing<br>swimsuit<br>underpants<br>phone<br>floor | ground<br>person<br>way<br>grass<br>day<br>wood<br>several<br>wooded<br>forest<br>dirt           | indoor<br>woman<br>meat<br>floor<br>female<br>sport<br>swimsuit<br>cellphone<br>underwear<br>mirror                 | posing<br>wall<br>woman<br>vegetable<br>smiling<br>spectacles<br>sport<br>plastic<br>little<br>text        | indoor<br>man<br>sport<br>barbell<br>underpants<br>exercisedevice<br>swimsuit<br>male<br>sand<br>holding |

## Exercise (Page 2)

|                 | <i>Bodybuilding</i>                                                                                            | <i>Energy &amp; hydration</i>                                                                        | <i>Yoga</i>                                                                                                    | <i>Weight loss (82)</i>                                                                                                                                        | <i>Weight loss (94)</i>                                                                                                 |
|-----------------|----------------------------------------------------------------------------------------------------------------|------------------------------------------------------------------------------------------------------|----------------------------------------------------------------------------------------------------------------|----------------------------------------------------------------------------------------------------------------------------------------------------------------|-------------------------------------------------------------------------------------------------------------------------|
| <b>Hashtags</b> | bodybuilding<br>shredded<br>muscle<br>gym<br>abs<br>physique<br>veins<br>gymlife<br>bodybuilder<br>gains       | health<br>fitness<br>water<br>cramps<br>dehydration<br>fit<br>energy<br>dehydrated<br>fluids<br>love | yoga<br>breathing<br>yogi<br>balance<br>yogaeverydamnday<br>meditation<br>namaste<br>ear<br>breathe<br>stretch | weightloss<br>weightlossjourney<br>fitfam<br>wls<br>transformation<br>gastric<br>wlscommunity<br>weightlosstransformation<br>gastricbypass<br>bariatricsurgery | weightloss<br>diet<br>healthy<br>dieting<br>fitfam<br>weightlossjourney<br>food<br>healthyeating<br>fitness<br>exercise |
| <b>Caption</b>  | bro<br>man<br>nice<br>work<br>likes<br>gym<br>muscle<br>hard<br>follow<br>training                             | water<br>body<br>blood<br>helps<br>drink<br>energy<br>reduce<br>drinking<br>increase<br>heart        | yoga<br>body<br>love<br>breathing<br>mind<br>class<br>breath<br>practice<br>pose<br>breathe                    | amazing<br>congrats<br>great<br>good<br>weight<br>i've<br>work<br>i'll<br>lbs<br>proud                                                                         | week<br>back<br>days<br>morning<br>tonight<br>weeks<br>healthy<br>don't<br>bit<br>weekend                               |
| <b>Image</b>    | man<br>underpants<br>sport<br>indoor<br>barbell<br>cellphone<br>phone<br>holding<br>exercisedevice<br>swimsuit | food<br>floor<br>red<br>beverage<br>breakfast<br>laying<br>surrounded<br>purple<br>shore<br>highway  | beautiful<br>indoor<br>shore<br>tree<br>water<br>beach<br>floor<br>park<br>feet<br>silhouette                  | dish<br>standing<br>indoor<br>meat<br>meal<br>pan<br>eaten<br>smiling<br>container<br>different                                                                | meat<br>meal<br>table<br>breakfast<br>dinner<br>piecederesistance<br>cup<br>plate<br>potato<br>egg                      |

| Healthcare & medicine |                                                                                                                |                                                                                                           |                                                                                                      |                                                                                                               |                                                                                                         |
|-----------------------|----------------------------------------------------------------------------------------------------------------|-----------------------------------------------------------------------------------------------------------|------------------------------------------------------------------------------------------------------|---------------------------------------------------------------------------------------------------------------|---------------------------------------------------------------------------------------------------------|
|                       | <i>Healthcare</i>                                                                                              | <i>Nursing</i>                                                                                            | <i>Hospitalization</i>                                                                               | <i>Health science</i>                                                                                         | <i>Vaccination</i>                                                                                      |
| <b>Hashtags</b>       | medicine<br>doctor<br>nurse<br>surgery<br>medical<br>medstudent<br>hospital<br>medschool<br>doctors<br>surgeon | nurse<br>hospital<br>nurselife<br>rn<br>follow<br>picoftheday<br>work<br>inspire<br>fitness<br>nurses     | sick<br>hospital<br>surgery<br>strong<br>pain<br>funny<br>smile<br>pneumonia<br>blessed<br>goodvibes | medicine<br>nature<br>antibiotics<br>cancer<br>infection<br>science<br>food<br>stress<br>symptoms<br>organic  | sad<br>flu<br>aesthetics<br>vaccines<br>vaccine<br>aesthetic<br>tumblr<br>hurting<br>flushot<br>organic |
| <b>Caption</b>        | doctor<br>medical<br>surgery<br>patients<br>patient<br>hospital<br>medicine<br>doctors<br>school<br>disease    | lol<br>haha<br>omg<br>true<br>lmao<br>don't<br>hahaha<br>yeah<br>bad<br>remember                          | hope<br>prayers<br>love<br>sending<br>praying<br>recovery<br>strong<br>good<br>stay<br>hospital      | research<br>infection<br>found<br>antibiotics<br>symptoms<br>study<br>cell<br>bacteria<br>science<br>products | flu<br>vaccines<br>vaccine<br>people<br>shot<br>children<br>don't<br>child<br>vaccinated<br>parents     |
| <b>Image</b>          | posing<br>indoor<br>plastic<br>room<br>wearing<br>screenshot<br>suit<br>arthropod<br>invertebrate<br>shop      | posing<br>indoor<br>ground<br>lady<br>glasses<br>tan<br>doll<br>pictureframe<br>newspaper<br>headcovering | posing<br>bed<br>spectacles<br>room<br>baby<br>blue<br>little<br>ground<br>boy<br>family             | indoor<br>close<br>mammal<br>people<br>beer<br>vegetable<br>holding<br>document<br>sign<br>fresh              | indoor<br>hand<br>black<br>beautiful<br>meal<br>domesticcat<br>screenshot<br>holding<br>lady<br>carseat |



## Mental health

|                 | <i>Mental health</i>                                                                                                 | <i>Suicide &amp; self-harm</i>                                                                               | <i>Eating disorders</i>                                                                                                                     |
|-----------------|----------------------------------------------------------------------------------------------------------------------|--------------------------------------------------------------------------------------------------------------|---------------------------------------------------------------------------------------------------------------------------------------------|
| <b>Hashtags</b> | anxiety<br>depression<br>mentalhealth<br>mentalillness<br>recovery<br>anxious<br>depressed<br>bipolar<br>ptsd<br>bpd | anxiety<br>depressed<br>sad<br>suicide<br>suicidal<br>depression<br>cutting<br>sadness<br>broken<br>selfharm | recovery<br>anorexia<br>edrecovery<br>eatingdisorder<br>ana<br>eatingdisorderrecovery<br>edwarrior<br>ed<br>anorexiarecovery<br>prorecovery |
| <b>Caption</b>  | people<br>mental<br>anxiety<br>health<br>depression<br>illness<br>life<br>feel<br>talk<br>disorder                   | don't<br>feel<br>talk<br>people<br>hate<br>i've<br>stop<br>anymore<br>fucking<br>cry                         | day<br>i've<br>today<br>hope<br>eating<br>feel<br>recovery<br>don't<br>proud<br>strong                                                      |
| <b>Image</b>    | posing<br>indoor<br>plant<br>smiling<br>nature<br>white<br>screenshot<br>hairpiece<br>way<br>blackboard              | close<br>dark<br>woman<br>staring<br>clouds<br>hand<br>cloudy<br>road<br>nightsky<br>mountain                | plate<br>meal<br>vegetable<br>breakfast<br>table<br>sliced<br>containing<br>dish<br>eaten<br>snackfood                                      |

| Musculoskeletal health & dermatology |                                                                                                  |                                                                                                              |                                                                                                              |                                                                                                              |                                                                                                  |                                                                                                               |                                                                                                              |
|--------------------------------------|--------------------------------------------------------------------------------------------------|--------------------------------------------------------------------------------------------------------------|--------------------------------------------------------------------------------------------------------------|--------------------------------------------------------------------------------------------------------------|--------------------------------------------------------------------------------------------------|---------------------------------------------------------------------------------------------------------------|--------------------------------------------------------------------------------------------------------------|
|                                      | <i>Musculoskeletal pain</i>                                                                      | <i>Massage</i>                                                                                               | <i>Injuries &amp; rehabilitation</i>                                                                         | <i>Skin health</i>                                                                                           | <i>Tanning</i>                                                                                   | <i>Cosmetic surgery</i>                                                                                       | <i>Dental health</i>                                                                                         |
| <b>Hashtags</b>                      | spine<br>pain<br>chiropractic<br>backpain<br>muscles<br>smile<br>yoga<br>life<br>back<br>massage | massage<br>pain<br>relax<br>arthritis<br>aches<br>therapy<br>wellness<br>painrelief<br>tension<br>relaxation | rehab<br>recovery<br>injury<br>crossfit<br>ankle<br>knee<br>physicaltherapy<br>athlete<br>strength<br>sports | skincare<br>acne<br>skin<br>beauty<br>organic<br>antiaging<br>pimples<br>clearskin<br>facial<br>eczema       | sunscreen<br>love<br>sun<br>nofilter<br>summer<br>beauty<br>sunburn<br>viral<br>beach<br>organic | beauty<br>surgery<br>clinic<br>skin<br>face<br>treatment<br>aesthetics<br>doctor<br>plasticsurgery<br>surgeon | dentist<br>dental<br>smile<br>teeth<br>dentistry<br>tooth<br>toothache<br>surgery<br>odontologia<br>dentista |
| <b>Caption</b>                       | back<br>pain<br>spine<br>neck<br>important<br>lower<br>shoulder<br>core<br>stretch<br>spinal     | pain<br>massage<br>body<br>muscle<br>muscles<br>relief<br>deep<br>arthritis<br>sore<br>aches                 | knee<br>ankle<br>injury<br>foot<br>pain<br>recovery<br>leg<br>training<br>hip<br>surgery                     | skin<br>acne<br>products<br>face<br>cream<br>oil<br>natural<br>mask<br>product<br>dry                        | hair<br>sun<br>sunscreen<br>light<br>free<br>pretty<br>face<br>side<br>city<br>hand              | call<br>results<br>treatment<br>surgery<br>info<br>nose<br>clinic<br>patient<br>consultation<br>email         | teeth<br>smile<br>tooth<br>dental<br>mouth<br>dentist<br>treatment<br>patient<br>case<br>office              |
| <b>Image</b>                         | wall<br>animal<br>group<br>floor<br>sky<br>posing<br>woman<br>red<br>water<br>wooden             | indoor<br>close<br>man<br>floor<br>decorated<br>wearing<br>half<br>hotel<br>honey<br>cake                    | floor<br>people<br>outdoor<br>feet<br>sport<br>ceiling<br>wall<br>field<br>shoes<br>indoor                   | posing<br>several<br>beverage<br>arranged<br>lotion<br>smiling<br>hair<br>green<br>staring<br>vectorgraphics | posing<br>shore<br>sky<br>beach<br>sitting<br>hairpiece<br>headdress<br>sand<br>set<br>swimming  | posing<br>hair<br>woman<br>female<br>spectacles<br>room<br>clothing<br>young<br>clouds<br>cosmetic            | posing<br>close<br>dessert<br>plastic<br>toothbrush<br>eyes<br>cosmetic<br>floor<br>brush<br>mouth           |

| Sleep           |                                                                                                        |                                                                                                      |
|-----------------|--------------------------------------------------------------------------------------------------------|------------------------------------------------------------------------------------------------------|
|                 | <i>Sleep</i>                                                                                           | <i>Insomnia</i>                                                                                      |
| <b>Hashtags</b> | bedtime<br>instagood<br>tired<br>photooftheday<br>sleep<br>dark<br>sleepy<br>bed<br>goodnight<br>night | insomnia<br>bedtime<br>workout<br>art<br>selfie<br>rest<br>night<br>natural<br>sleepy<br>amazing     |
| <b>Caption</b>  | love<br>cute<br>haha<br>bed<br>time<br>omg<br>miss<br>nice<br>cool<br>adorable                         | sleep<br>night<br>bed<br>hours<br>time<br>back<br>asleep<br>sleeping<br>make<br>nights               |
| <b>Image</b>    | laying<br>mammal<br>bed<br>girl<br>bedclothes<br>young<br>pillow<br>night<br>red<br>brown              | indoor<br>lying<br>bedclothes<br>smiling<br>pillow<br>blanket<br>sofa<br>bedroom<br>glasses<br>cloth |

| Substance use   |                                                                                                                  |                                                                                                                     |                                                                                                 |
|-----------------|------------------------------------------------------------------------------------------------------------------|---------------------------------------------------------------------------------------------------------------------|-------------------------------------------------------------------------------------------------|
|                 | <i>Marijuana</i>                                                                                                 | <i>Caffeine</i>                                                                                                     | <i>Alcohol</i>                                                                                  |
| <b>Hashtags</b> | cannabis<br>chronic<br>marijuana<br>weed<br>weedstagram<br>cannabiscommunity<br>thc<br>dank<br>hightimes<br>dabs | caffeine<br>coffee<br>coffeelover<br>cofeeaddict<br>coffeetime<br>coffeeholic<br>hot<br>drink<br>cafe<br>cofeeagram | alcohol<br>thirsty<br>drinks<br>beer<br>cocktails<br>wine<br>drink<br>cocktail<br>bar<br>yummy  |
| <b>Caption</b>  | check<br>cannabis<br>high<br>cbd<br>smoke<br>stay<br>fire<br>marijuana<br>weed<br>product                        | coffee<br>day<br>tea<br>today<br>love<br>drink<br>cup<br>hot<br>green<br>feeling                                    | drink<br>glass<br>beer<br>water<br>wine<br>make<br>cheers<br>juice<br>bottle<br>bar             |
| <b>Image</b>    | vegetable<br>close<br>plant<br>hand<br>eaten<br>piece<br>leaf<br>half<br>tree<br>palm                            | beverage<br>food<br>coffee<br>table<br>drink<br>coffeecup<br>breakfast<br>pastry<br>dixiecup<br>doughnut            | beverage<br>glass<br>drink<br>alcohol<br>beer<br>fruitdrink<br>food<br>drinking<br>empty<br>bar |
